# Supplementary material for: Optimization of Polyhydroxybutyrate Production by Amazonian Microalga Stigeoclonium sp. B23
Source: PubMed Central journal article supplement (PMC7761742; doi:10.3390/biom10121628), 2020-12-03
Supplement: biomolecules-10-01628-s001.pdf [file biomolecules-10-01628-s001.pdf]

**Supplementary Materials:** The following are available online at <https://www.mdpi.com/2218-273X/10/12/1628/s1>.

TCAGGTGGGAGGGTTTAATGAACTTCTCGGGGACGGTGGGAGAGACTCCCGACCGTCCTCAATCC  
 GAACACTTCACCAGCACACCCAATCGGTAGGAGCGACGGGCGGTGTGTACAAAGGGCAGGGACG  
 TAATCAACGCGAGCTGATGACTCGCGCTTACTAGGCATTCTCGTTGAAGACTAATAATTGCAATA  
 ATCTATCCCCATCACGATGCAGTTCAAAGATTACCCGGGCCTCTCGGCCAAGGATAGGCTCGTTG  
 AATGCATCAGTGTAGCGCGCGTGCGGCCAGAACATCTAAGGGCATCACAGACCTGTTATTGCCT  
 CATACTCCATIGCCTAAACGACAATAGTCCCTCTAAGAAGTCTGCCAGCCGCAAGAAGCGGCAG  
 TGACTIONTACAGGCTGAGGTCTCGTTACCGGAATCAACCTGACAAGGCAACCCACCAAC  
 TAAGAACGGCCATGCACCACCACCCATAGAATCAAGAAAGAGCTCTCAATCTGGATCA

**Figure S1.** 18S rRNA sequence from *Stigeoclonium* sp. B23.

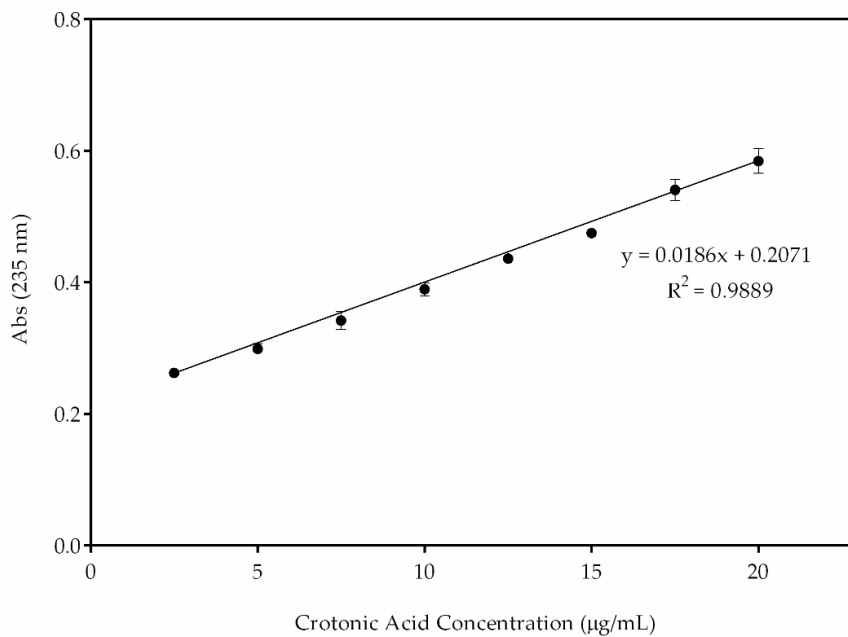

**Figure S2.** Standard curve from commercial acid crotonic. UV absorbance 235 nm is plotted as a function of amount of acid crotonic in µg/mL. Data are the mean±SD of three replicates.

**Table S1.** ANOVA table of fluorescence of PHB quantity in modified BG-11 media of *Stigeoclonium* sp. B23 at the 95% confidence level.

|                    | Degrees of freedom | Sum of squares | Mean of squares | Fcalc | P value    |
|--------------------|--------------------|----------------|-----------------|-------|------------|
| Interaction        | 84                 | 1.971e+9       | 2.346e+7        | 18.00 | P < 0.0001 |
| Daily fluorescence | 12                 | 3.281e+9       | 2.734e+8        | 209.8 | P < 0.0001 |
| Treatments         | 7                  | 1.437e+9       | 2.052e+8        | 157.5 | P < 0.0001 |
| Residual (error)   | 208                | 2.711e+8       | 1.303e+6        |       |            |
| Total              | 311                | 6.959e+9       | -               |       |            |

**Table S2.** ANOVA table of PHB quantity in modified BG-11 media of *Stigeoclonium* sp. B23 at the 95% confidence level.

|                  | Degrees of freedom | Sum of squares | Mean of squares | Fcalc | P value    |
|------------------|--------------------|----------------|-----------------|-------|------------|
| Interaction      | 84                 | 11,252         | 134.0           | 24.62 | P < 0.0001 |
| Daily PHB        | 12                 | 18,276         | 1,523           | 279.9 | P < 0.0001 |
| Treatments       | 7                  | 7,993          | 1,142           | 209.9 | P < 0.0001 |
| Residual (error) | 208                | 1,132          | 5.441           |       |            |
| Total            | 311                | 38,653         | -               |       |            |

**Table S3.** Tukey's post hoc multiple comparisons of fluorescence of PHB between modified BG-11 media. The mean difference is significant at the 0.05 level.

| Treatment comparisons                           | Mean difference | 95% confidence interval |             | P value  |
|-------------------------------------------------|-----------------|-------------------------|-------------|----------|
|                                                 |                 | Lower bound             | Upper bound |          |
| BG-11 vs. BG-11A                                | -5285           | -6076                   | -4493       | < 0.0001 |
| BG-11 vs. BG-11B                                | -5146           | -5938                   | -4355       | < 0.0001 |
| BG-11 vs. BG-11A+B                              | -6386           | -7178                   | -5594       | < 0.0001 |
| BG-11 vs. BG-11 <sub>0</sub>                    | -4695           | -5487                   | -3904       | < 0.0001 |
| BG-11 vs. BG-11 <sub>0+A</sub>                  | -6026           | -6818                   | -5235       | < 0.0001 |
| BG-11 vs. BG-11 <sub>0+B</sub>                  | -3080           | -3871                   | -2288       | < 0.0001 |
| BG-11 vs. BG-11 <sub>0+A+B</sub>                | -7345           | -8136                   | -6553       | < 0.0001 |
| BG-11A vs. BG-11B                               | 138.5           | -653.1                  | 930.1       | 0.9995   |
| BG-11A vs. BG-11A+B                             | -1101           | -1893                   | -309.7      | 0.0008   |
| BG-11A vs. BG-11 <sub>0</sub>                   | 589.3           | -202.3                  | 1381        | 0.3099   |
| BG-11A vs. BG-11 <sub>0+A</sub>                 | -741.7          | -1533                   | 49.92       | 0.0844   |
| BG-11A vs. BG-11 <sub>0+B</sub>                 | 2205            | 1413                    | 2997        | < 0.0001 |
| BG-11A vs. BG-11 <sub>0+A+B</sub>               | -2060           | -2852                   | -1269       | < 0.0001 |
| BG-11B vs. BG-11A+B                             | -1240           | -2031                   | -448.2      | < 0.0001 |
| BG-11B vs. BG-11 <sub>0</sub>                   | 450.8           | -340.8                  | 1242        | 0.6586   |
| BG-11B vs. BG-11 <sub>0+A</sub>                 | -880.2          | -1672                   | -88.60      | 0.0178   |
| BG-11B vs. BG-11 <sub>0+B</sub>                 | 2066            | 1275                    | 2858        | < 0.0001 |
| BG-11B vs. BG-11 <sub>0+A+B</sub>               | -2199           | -2990                   | -1407       | < 0.0001 |
| BG-11A+B vs. BG-11 <sub>0</sub>                 | 1691            | 899.0                   | 2482        | < 0.0001 |
| BG-11A+B vs. BG-11 <sub>0+A</sub>               | 359.6           | -432.0                  | 1151        | 0.8605   |
| BG-11A+B vs. BG-11 <sub>0+B</sub>               | 3306            | 2515                    | 4098        | < 0.0001 |
| BG-11A+B vs. BG-11 <sub>0+A+B</sub>             | -958.8          | -1750                   | -167.2      | 0.0064   |
| BG-11 <sub>0</sub> vs. BG-11 <sub>0+A</sub>     | -1331           | -2123                   | -539.4      | < 0.0001 |
| BG-11 <sub>0</sub> vs. BG-11 <sub>0+B</sub>     | 1616            | 824.1                   | 2407        | < 0.0001 |
| BG-11 <sub>0</sub> vs. BG-11 <sub>0+A+B</sub>   | -2649           | -3441                   | -1858       | < 0.0001 |
| BG-11 <sub>0+A</sub> vs. BG-11 <sub>0+B</sub>   | 2947            | 2155                    | 3738        | < 0.0001 |
| BG-11 <sub>0+A</sub> vs. BG-11 <sub>0+A+B</sub> | -1318           | -2110                   | -526.9      | < 0.0001 |
| BG-11 <sub>0+B</sub> vs. BG-11 <sub>0+A+B</sub> | -4265           | -5057                   | -3474       | < 0.0001 |

**Table S4.** Tukey's post hoc multiple comparisons of PHB between modified BG-11 media. The mean difference is significant at the 0.05 level.

| Treatment comparisons                           | Mean difference | 95% confidence interval |             | P value  |
|-------------------------------------------------|-----------------|-------------------------|-------------|----------|
|                                                 |                 | Lower bound             | Upper bound |          |
| BG-11 vs. BG-11 <sub>A</sub>                    | -12.40          | -14.02                  | -10.79      | < 0.0001 |
| BG-11 vs. BG-11 <sub>B</sub>                    | -12.36          | -13.98                  | -10.74      | < 0.0001 |
| BG-11 vs. BG-11 <sub>A+B</sub>                  | -15.00          | -16.62                  | -13.38      | < 0.0001 |
| BG-11 vs. BG-11 <sub>0</sub>                    | -10.32          | -11.94                  | -8.700      | < 0.0001 |
| BG-11 vs. BG-11 <sub>0+A</sub>                  | -14.17          | -15.78                  | -12.55      | < 0.0001 |
| BG-11 vs. BG-11 <sub>0+B</sub>                  | -7.614          | -9.231                  | -5.996      | < 0.0001 |
| BG-11 vs. BG-11 <sub>0+A+B</sub>                | -17.51          | -19.13                  | -15.90      | < 0.0001 |
| BG-11 <sub>A</sub> vs. BG-11 <sub>B</sub>       | 0.04420         | -1.573                  | 1.662       | > 0.9999 |
| BG-11 <sub>A</sub> vs. BG-11 <sub>A+B</sub>     | -2.594          | -4.212                  | -0.9766     | < 0.0001 |
| BG-11 <sub>A</sub> vs. BG-11 <sub>0</sub>       | 2.087           | 0.4692                  | 3.704       | 0.0027   |
| BG-11 <sub>A</sub> vs. BG-11 <sub>0+A</sub>     | -1.762          | -3.379                  | -0.1443     | 0.0222   |
| BG-11 <sub>A</sub> vs. BG-11 <sub>0+B</sub>     | 4.791           | 3.173                   | 6.408       | < 0.0001 |
| BG-11 <sub>A</sub> vs. BG-11 <sub>0+A+B</sub>   | -5.109          | -6.726                  | -3.491      | < 0.0001 |
| BG-11 <sub>B</sub> vs. BG-11 <sub>A+B</sub>     | -2.638          | -4.256                  | -1.021      | < 0.0001 |
| BG-11 <sub>B</sub> vs. BG-11 <sub>0</sub>       | 2.043           | 0.4250                  | 3.660       | 0.0036   |
| BG-11 <sub>B</sub> vs. BG-11 <sub>0+A</sub>     | -1.806          | -3.424                  | -0.1885     | 0.0170   |
| BG-11 <sub>B</sub> vs. BG-11 <sub>0+B</sub>     | 4.747           | 3.129                   | 6.364       | < 0.0001 |
| BG-11 <sub>B</sub> vs. BG-11 <sub>0+A+B</sub>   | -5.153          | -6.771                  | -3.536      | < 0.0001 |
| BG-11 <sub>A+B</sub> vs. BG-11 <sub>0</sub>     | 4.681           | 3.063                   | 6.298       | < 0.0001 |
| BG-11 <sub>A+B</sub> vs. BG-11 <sub>0+A</sub>   | 0.8323          | -0.7852                 | 2.450       | 0.7644   |
| BG-11 <sub>A+B</sub> vs. BG-11 <sub>0+B</sub>   | 7.385           | 5.767                   | 9.002       | < 0.0001 |
| BG-11 <sub>A+B</sub> vs. BG-11 <sub>0+A+B</sub> | -2.515          | -4.132                  | -0.8974     | < 0.0001 |
| BG-11 <sub>0</sub> vs. BG-11 <sub>0+A</sub>     | -3.849          | -5.466                  | -2.231      | < 0.0001 |
| BG-11 <sub>0</sub> vs. BG-11 <sub>0+B</sub>     | 2.704           | 1.087                   | 4.322       | < 0.0001 |
| BG-11 <sub>0</sub> vs. BG-11 <sub>0+A+B</sub>   | -7.196          | -8.813                  | -5.578      | < 0.0001 |
| BG-11 <sub>0+A</sub> vs. BG-11 <sub>0+B</sub>   | 6.553           | 4.935                   | 8.170       | < 0.0001 |
| BG-11 <sub>0+A</sub> vs. BG-11 <sub>0+A+B</sub> | -3.347          | -4.965                  | -1.730      | < 0.0001 |
| BG-11 <sub>0+B</sub> vs. BG-11 <sub>0+A+B</sub> | -9.900          | -11.52                  | -8.282      | < 0.0001 |

**Table S5.** Data of mean and standard deviation of fluorescence in modified growth media with nitrate.

| Day | BG-11    |          | BG-11 <sub>A</sub> |          | BG-11 <sub>B</sub> |          | BG-11 <sub>A+B</sub> |          |
|-----|----------|----------|--------------------|----------|--------------------|----------|----------------------|----------|
|     | Mean     | SD       | Mean               | SD       | Mean               | SD       | Mean                 | SD       |
| 1   | 6310.667 | 759.2953 | 11013.330          | 730.847  | 8455.333           | 414.9811 | 10232.000            | 1862.828 |
| 3   | 6387.333 | 434.7382 | 8957.333           | 335.287  | 8350.667           | 629.5438 | 9463.333             | 429.1449 |
| 5   | 6372.000 | 248.3626 | 8094.000           | 300.020  | 8124.667           | 477.6037 | 8062.000             | 639.9781 |
| 8   | 6533.333 | 568.0998 | 9650.667           | 1082.930 | 8394.667           | 487.1194 | 9154.667             | 644.3301 |
| 10  | 6502.000 | 567.757  | 10868.000          | 2102.076 | 9788.667           | 1353.333 | 10108.000            | 633.0593 |
| 12  | 6768.000 | 167.7975 | 11817.330          | 749.4113 | 8595.333           | 1053.186 | 9792.667             | 21.00793 |
| 15  | 6789.333 | 314.454  | 14167.000          | 1194.420 | 10182.670          | 1717.009 | 10719.330            | 354.0301 |
| 17  | 6950.667 | 436.0566 | 10553.330          | 32.08323 | 11668.670          | 352.8701 | 12512.670            | 826.8067 |
| 19  | 6564.000 | 124.3865 | 10992.000          | 230.7293 | 11688.670          | 545.3158 | 13222.330            | 1310.249 |
| 22  | 6612.667 | 139.7331 | 13555.000          | 656.6285 | 13121.000          | 2820.188 | 16935.000            | 687.5551 |
| 24  | 6159.333 | 110.1514 | 13007.670          | 1660.981 | 14261.330          | 956.0807 | 19125.670            | 1627.110 |
| 27  | 6750.667 | 236.7474 | 15005.670          | 411.4564 | 24259.670          | 1140.881 | 20732.670            | 668.7431 |
| 30  | 7284.000 | 396.651  | 17003.000          | 1152.361 | 15992.330          | 978.2624 | 18941.330            | 2360.497 |

**Table S6.** Data of mean and standard deviation of fluorescence in modified growth media with nitrogen deprivation.

| Day | BG-11 <sub>0</sub> |          | BG-11 <sub>0+A</sub> |          | BG-11 <sub>0+B</sub> |          | BG-11 <sub>0+A+B</sub> |          |
|-----|--------------------|----------|----------------------|----------|----------------------|----------|------------------------|----------|
|     | Mean               | SD       | Mean                 | SD       | Mean                 | SD       | Mean                   | SD       |
| 1   | 6021.333           | 212.5308 | 9906.000             | 307.5906 | 7444.667             | 1393.063 | 8537.333               | 82.80902 |
| 3   | 6388.667           | 192.2533 | 12762.000            | 456.6487 | 5688.667             | 306.8376 | 9250.000               | 414.8445 |
| 5   | 6363.333           | 306.0349 | 10773.330            | 1077.869 | 5820.667             | 251.0166 | 9301.333               | 1246.044 |
| 8   | 6146.667           | 251.7962 | 11342.000            | 1042.466 | 6125.333             | 246.4332 | 10768.670              | 2122.887 |
| 10  | 6316.000           | 191.8228 | 9886.000             | 1528.318 | 6684.000             | 442.7144 | 9769.333               | 356.0019 |
| 12  | 7506.667           | 209.0391 | 9934.000             | 326.2147 | 6877.333             | 169.3084 | 9909.333               | 692.9166 |
| 15  | 8478.000           | 366.6443 | 11461.330            | 259.556  | 7346.667             | 648.9448 | 12222.670              | 1481.568 |
| 17  | 11925.330          | 999.2043 | 10717.330            | 662.143  | 8078.667             | 236.5784 | 18272.670              | 2760.394 |
| 19  | 17077.330          | 724.7899 | 11115.330            | 1495.115 | 12634.000            | 955.7155 | 14900.000              | 2195.070 |
| 22  | 20526.330          | 978.2159 | 12254.670            | 911.7156 | 12102.330            | 1325.480 | 14958.330              | 319.4391 |
| 24  | 15975.670          | 1952.396 | 16895.330            | 1155.858 | 13733.330            | 360.1852 | 24287.000              | 1128.177 |
| 27  | 17432.000          | 1791.150 | 24933.670            | 1698.459 | 18431.330            | 869.7151 | 12269.000              | 2430.500 |
| 30  | 16866.000          | 3338.855 | 12345.330            | 846.0693 | 15052.670            | 1690.447 | 27021.000              | 3574.167 |

**Table S7.** Data of mean and standard deviation of extraction-based PHB quantification in modified growth media with nitrogen.

| Day | BG-11    |           | BG-11A   |            | BG-11B   |           | BG-11A+B |            |
|-----|----------|-----------|----------|------------|----------|-----------|----------|------------|
|     | Mean     | SD        | Mean     | SD         | Mean     | SD        | Mean     | SD         |
| 1   | 14.86196 | 1.78843   | 25.93852 | 1.721422   | 19.91346 | 0.9774411 | 24.09818 | 4.387668   |
| 3   | 15.04253 | 1.023973  | 21.09586 | 0.7897311  | 19.66693 | 1.482814  | 22.28768 | 1.010799   |
| 5   | 15.00642 | 0.5849894 | 19.06238 | 0.7066602  | 19.13461 | 1.124939  | 18.98701 | 1.507392   |
| 8   | 15.38642 | 1.338091  | 22.72892 | 2.550712   | 19.77057 | 1.147349  | 21.56065 | 1.517645   |
| 10  | 15.31262 | 1.337283  | 25.59621 | 4.951184   | 23.05397 | 3.187614  | 23.80612 | 1.491093   |
| 12  | 15.93915 | 0.3952259 | 27.83225 | 1.765149   | 20.24322 | 2.480652  | 23.06339 | 0.04948387 |
| 15  | 15.9894  | 0.7406616 | 33.3666  | 2.813316   | 23.98199 | 4.04421   | 25.24604 | 0.8338712  |
| 17  | 16.3694  | 1.027077  | 24.85505 | 0.07557172 | 27.48208 | 0.8311429 | 29.47002 | 1.947445   |
| 19  | 15.45865 | 0.292976  | 25.88827 | 0.5434573  | 27.52919 | 1.284424  | 31.14155 | 3.086132   |
| 22  | 15.57328 | 0.3291237 | 31.92511 | 1.546607   | 34.56954 | 3.428161  | 39.8863  | 1.619455   |
| 24  | 14.50551 | 0.2594465 | 30.63593 | 3.912241   | 33.58879 | 2.251937  | 45.04615 | 3.832462   |
| 27  | 15.89832 | 0.557632  | 35.34198 | 0.9691374  | 57.13867 | 2.687207  | 48.83124 | 1.575145   |
| 30  | 17.70924 | 0.3660937 | 40.04646 | 2.714248   | 37.66596 | 2.304179  | 44.61197 | 5.559862   |

**Table S8.** Data of mean and standard deviation of extraction-based PHB quantification in modified growth media without nitrogen.

| Day | BG-11 <sub>0</sub> |           | BG-11 <sub>0+A</sub> |           | BG-11 <sub>0+B</sub> |           | BG-11 <sub>0+A+B</sub> |           |
|-----|--------------------|-----------|----------------------|-----------|----------------------|-----------|------------------------|-----------|
|     | Mean               | SD        | Mean                 | SD        | Mean                 | SD        | Mean                   | SD        |
| 1   | 14.18046           | 0.5005932 | 23.33033             | 0.7244924 | 17.53296             | 3.281191  | 20.1066                | 0.195045  |
| 3   | 15.04568           | 0.4528322 | 30.0573              | 1.075581  | 13.39691             | 0.7227196 | 21.7852                | 0.9771153 |
| 5   | 14.98601           | 0.7208246 | 25.37323             | 2.538794  | 13.70782             | 0.5912426 | 21.90611               | 2.934909  |
| 8   | 14.47567           | 0.5930778 | 26.71265             | 2.455403  | 14.42543             | 0.5804445 | 25.36224               | 5.000205  |
| 10  | 14.87452           | 0.4518149 | 23.28322             | 3.599769  | 15.7413              | 1.042759  | 23.00843               | 0.8385173 |
| 12  | 17.67899           | 0.4923672 | 23.39628             | 0.7683578 | 16.19667             | 0.3987814 | 23.33818               | 1.632085  |
| 15  | 19.96685           | 0.8635891 | 26.99373             | 0.6113493 | 17.30213             | 1.528513  | 28.78696               | 3.489658  |
| 17  | 28.08663           | 2.353507  | 25.24133             | 1.559597  | 19.02627             | 0.5572321 | 43.03701               | 6.501774  |
| 19  | 40.22154           | 1.707151  | 26.17877             | 3.521567  | 29.75581             | 2.251072  | 35.09309               | 5.170225  |
| 22  | 46.67859           | 1.018235  | 28.86233             | 2.147433  | 34.45121             | 2.871845  | 35.2305                | 0.7523999 |
| 24  | 34.96004           | 3.216693  | 39.98569             | 2.492167  | 31.63439             | 1.517311  | 57.20304               | 2.657284  |
| 27  | 42.10924           | 2.514637  | 58.72619             | 4.000516  | 43.41073             | 2.048505  | 28.8961                | 5.724751  |
| 30  | 33.92219           | 2.247277  | 29.07589             | 1.992817  | 35.45268             | 3.981642  | 66.97599               | 1.546686  |
